## LITERATURE REVIEW: DISASTER RISK REDUCTION PROGRAMS TO INCREASE PUBLIC AWARENESS OF NATURAL DISASTERS

Susi Wahyuning Asih<sup>1</sup>, Moses Glorino Rumambo Pandin<sup>2</sup>, Ahmad Yusuf<sup>3</sup>, Supriyadi<sup>4</sup>

<sup>1</sup>Doctor of Nursing, Faculty of Nursing Universitas Airlangga

<sup>2</sup>Faculty of Humanities Universitas Airlangga

<sup>3</sup>Faculty of Nursing Universitas Airlangga

<sup>4</sup>Faculty of Dentistry, University of Jember

Email: [susi.wahyuning.asih-2023@fkn.unair.ac.id](mailto:susi.wahyuning.asih-2023@fkn.unair.ac.id) atau [susiwahyuningasih@unmuhjember.ac.id](mailto:susiwahyuningasih@unmuhjember.ac.id)

### ABSTRACT

**Background:** The key components of disaster risk reduction typically include risk assessment, early warning systems, public awareness and education, infrastructure and land-use planning, preparedness and response planning, and sustainable development. The third component is the public awareness and education. Educating communities about potential risks and how to prepare for and respond to disasters is crucial for building resilience and ensuring the effective implementation of DRR measures. The fourth component is infrastructure and land-use planning. Regarding the preparedness and response planning, developing comprehensive disaster preparedness and response plans is helpful in ensuring a swift and coordinated response during emergencies, thereby minimizing the impact on life and property. Lastly, regarding sustainable development, integrating DRR into development planning can help create sustainable and resilient communities that are better equipped to withstand and recover from disasters. **Purpose:** This study aims to review articles that examine the disaster risk reduction program to increase public awareness of natural disasters. **Design:** This study was categorized as a literature review. **Method:** Data were collected by searching articles published on SAGE, Springer link, Proquest, Scopus, and Science Direc in 2020-2023. **Results:** 263 articles were used in the review. These articles discuss the disaster risk reduction program to increase public awareness of natural disasters. Fifteen articles reviewed were original research. **Conclusion:** Local communities play a central role in hazard identification, development of preparedness plans, detection and response to emergencies, and implementation of recovery efforts. Community leaders and local health workers (e.g. family doctors, nurses, midwives, pharmacists, community health workers).

**Keywords:** Disaster risk reduction, awareness, natural disaster

### BACKGROUND

Disaster management seen from the perspective of community perception is very urgent and important to know as basic knowledge for the community about what to do in the face of disasters. The main components of disaster risk reduction (DRR) usually include disaster risk assessments, early warning systems, community awareness and education, and sustainable development. Risk assessment involves identifying, assessing, and analyzing risks that risk not associated with natural hazards, including their potential impact on society and the environment. Meanwhile, early warning systems

may help minimize the impact of disasters by alerting populations of imminent catastrophes in a timely and precise manner. (M.A. Chisty,2020). Regarding the third component, i.e., community awareness and education, educating communities about potential risks and how to prepare for and respond to disasters is critical to building resilience and ensuring effective implementation of DRR measures. Lastly, integrating DRR into development planning can help create sustainable and resilient communities that are better prepared to survive and recover from disasters.

Disasters are no longer considered a sporadic phenomenon but are managed and reduced as much as possible. It is no longer considered a danger that is impossible to handle. However, The issue of how to include the concept of safety in a catastrophic event requires further studies. To include institutions and social units in the field of catastrophe studies, the concept of "vulnerability" emerges, particularly concerning the existence of civilization and human life on the planet. Disasters, their causes, and their effect on human existence must be minimized and identified as early as possible to facilitate the development of a solution for disaster management (H. Setyawan, 2021).

Several studies have shown that treatments based on lifestyle might prevent between 40 and 70 percent of the implementation of a Disaster Risk Reduction (DRR) program. Disaster risk reduction in rural areas is necessary to increase the community's ability to cope with the disaster-related risks. In Kanyasan's study (2018), Community-based DRR, also known as the Community-Managed Disaster Risk Reduction training program, aims to empower the village community (Kanyasan K, 2018). Since the one-month training involves impacted village residents, it is extremely important to ensure the program significance . The initial hazard posed by the tragedy was landslides in the mountainous sections of the village, jeopardizing homes and agricultural land. This was the first step in gathering community members impacted by the disaster. Floating water is the second potential catastrophic concern.

Landslides occurring in the steep areas of the village pose the greatest risk to the settlements and agricultural land. This is the first hazard that might bring about a potential calamity. Floods are the second type of natural catastrophe that might occur. Floods that strike low-lying village sites, agricultural land, and settlements require good mapping (Haque A, 2022). The absence of a village spatial planning policy or long-term development plan for managing natural resources causes frequent shifts to land use, eventually resulting in shrinkage of agricultural land and increased risk of floods. Overstress on regional ecosystems and a decline in environmental carrying capacity are consequences of the population's increasingly pervasive poverty. Disaster risk management (DRM) expertise is still lacking among village residents and their elected

officials. Additionally, women are underrepresented in the decision-making and strategic policy-making processes related to disaster management and response. Many of the village's religious and social groups are now disorganized, but they potentially become a powerful voice in the DRR disaster risk management campaign (Lawangen A, 2023).

The village exhibits a strong culture of cooperation, tolerance, and the spirit of self-reliance, which are important factors in disaster management. Several steps are required to increase the disaster risk management capacity of village communities affected by disasters, **the first step** is to develop the community's understanding of the threats, vulnerabilities, capacities, and potential risks of landslides, floods, and factors that influence their area. **Secondly**, it is necessary to prepare potential local cadres to mobilize community participation in initiatives aimed at reducing disaster risks. **The third step is to** carry out participatory risk mapping of landslides and floods. **The fourth step** is to amplify women's role and strategic positions in village disaster risk management activities. Lastly, it is necessary to develop innovative actions for disaster risk management in village communities.

## **Method**

A literature study was conducted by scanning three databases (SAGE, Springer Link, Proquest, Scopus, and Science Direct) for relevant peer-reviewed articles published in English between 2020 and 2023. This review specifically targeted studies focusing on how DRR is put into practice. Encompassing experimental design, observation, and randomized and non-randomized controlled trials, the selected studies focused on the community's efforts to reduce catastrophe risk. The DRR's output was the primary outcome. The literature search only included open-access papers published between 2020 and 2023.

## **Result**

The author found 31,232 articles from three databases, including Scopus: 689 articles; Pubmed: 15,766 articles; CINAHL: 14,777 articles, after searching with specific keywords combined with Boolean "AND" and "OR" operators. The keywords of the PICO framework include Population (communities), Intervention (Mitigation Disaster), Comparison (cognitive and psychomotor), and Results (Disaster Risk Reduction condition).

Researchers also used this literature review search criteria with the PRISMA flow diagram to obtain appropriate and eligible research articles. The following is a diagram image *flow PRISMA*:

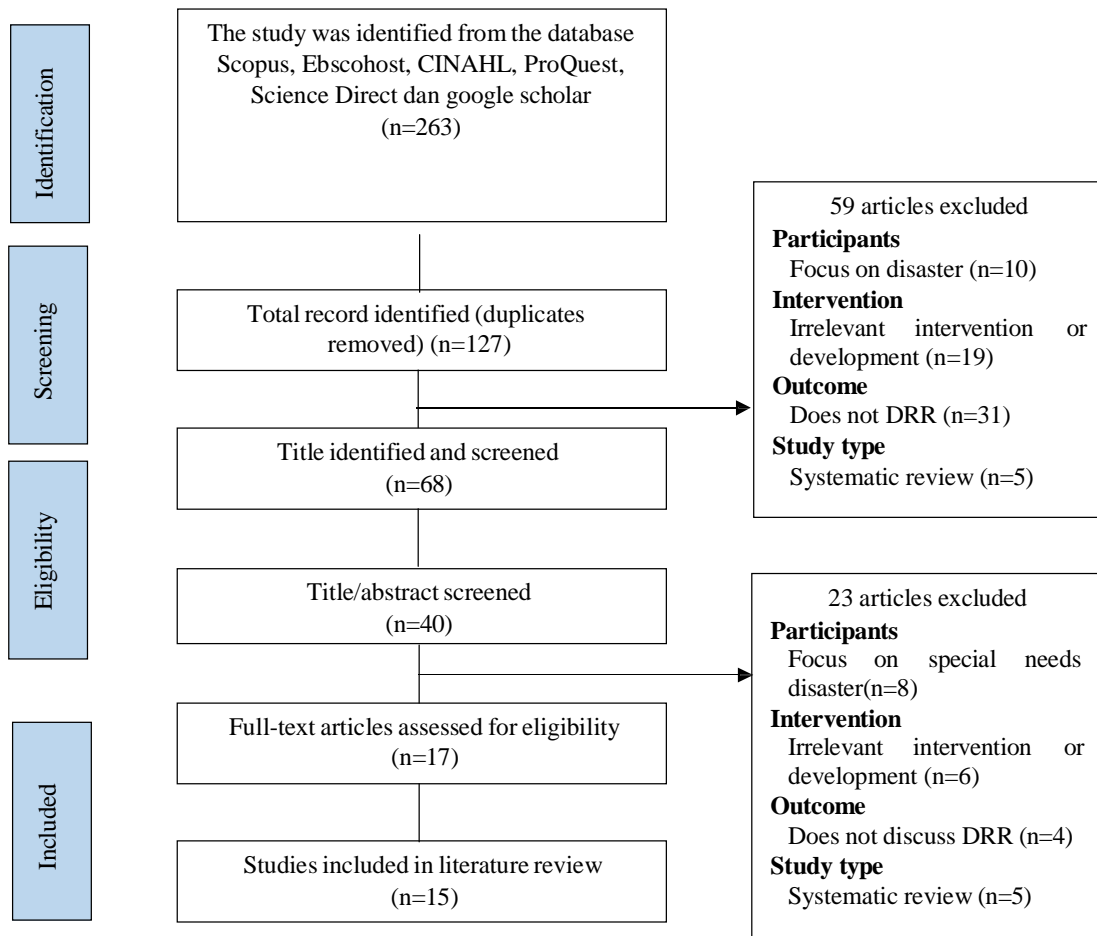

Tabel 1. Characteristics Of Review Studies

| No | TITLE, AUTHOR, YEAR                                                                                                                | METHOD                                                                                                   | RESULT                                                                                                                                                                                                                                                                                                                                                                                                                                                                                                                                                                                                                                                                                                                                |
|----|------------------------------------------------------------------------------------------------------------------------------------|----------------------------------------------------------------------------------------------------------|---------------------------------------------------------------------------------------------------------------------------------------------------------------------------------------------------------------------------------------------------------------------------------------------------------------------------------------------------------------------------------------------------------------------------------------------------------------------------------------------------------------------------------------------------------------------------------------------------------------------------------------------------------------------------------------------------------------------------------------|
| 1  | Implementation of disaster risk reduction and management policies in a school setting in Lao PDR<br><br>(Khetshana-, Daisuke_2019) | D: Case Study<br>S: 52 sample<br>V: disaster risk reduction<br>I: Questionare<br>A: Data analysis        | Three themes emerged: policy content and dissemination, factors which affect policy implementation, and impacts of policy implementation facilitating factors include effective coordination and ownership among the national DMC members for scaling up disaster risk reduction (DRR) activities, and strong support from the central government. Barriers include unclear provisions in the national legislation, unclear mandates especially on leading the program, poor monitoring system, insufficient human resources, and lack of public-private partnerships. All the study schools conducted DRR classes and designated a disaster assembly point. More than 80% of the students correctly answered items on fire response. |
| 2  | Towards eveloping a model for the evaluation of hospital disaster resilience: a systematicreview<br>(Saeed, Abbas_2020)            | D:Systematic Review<br>S: 89 sample<br>V:disaster Resilience<br>I: Questionare<br>A:Descriptive analisis | Thirty-two articles and guidelines were then selected and analyzed to collect the indicators related to hospital disaster resilience (HDR). The domains and the indicators were extracted from these selected research studies. The authors collected and categorized them into three domains and twenty seven subdomains. The three domains included constructive, infrastructural, and administrative resilience. The relevant indicators were designed for each subdomain to assess HDR                                                                                                                                                                                                                                            |
| 3  | The pathways between natural disasters and violence against children: a systematic review<br><br>(Ilan, Hanna_2021)                | D: Systematic review<br>S: 72 sample<br>V:natural disasters<br>I: Questionare<br>A: Meta Analysis        | Service providers would benefit from systematic documentation to a high-quality standard of all possible pathways to violence in tailoring programming after natural disasters. The identified pathways in this review provide a foundation for designing targeted prevention services. In addition, the positive coping strategies within certain affected families and communities can be leveraged in implementing strength-based approaches to violence prevention.                                                                                                                                                                                                                                                               |

|   |                                                                                                                                                                                                |                                                                                                                                                               |                                                                                                                                                                                                                                                                                                                                                                                                                                                                                                                         |
|---|------------------------------------------------------------------------------------------------------------------------------------------------------------------------------------------------|---------------------------------------------------------------------------------------------------------------------------------------------------------------|-------------------------------------------------------------------------------------------------------------------------------------------------------------------------------------------------------------------------------------------------------------------------------------------------------------------------------------------------------------------------------------------------------------------------------------------------------------------------------------------------------------------------|
| 4 | <p>Assessment of school teachers' disaster preparedness using the extended parallel process model: a cross-sectional study in Angeles City, Philippines</p> <p>(Chrizeda, Rapael) 2021</p>     | <p>D: descriptive study using a cross-sectional survey<br/> S: 74 sample<br/> V: disaster preparedness<br/> I: Questionnaire<br/> A: descriptive analysis</p> | <p>A high percentage of the respondents exhibited danger control responses, although fear control responses were also observed. Perceptions of fear were highest for terrorist attacks and lowest for flood, there is evidence that teachers basically show positive attitudes and intentions towards disaster preparedness, but lack sufficient motivation to exhibit excellent disaster preparedness behavior due to the low perceived threat</p>                                                                     |
| 5 | <p>The role of green Industrial transformation in Mitigating carbon emissions Exploring the channels of technological innovation and environmental regulation</p> <p>(Shaima, Khalid_2023)</p> | <p>D: literature review<br/> S: 89 sample<br/> V: mitigasi disaster<br/> I: Questionnaire<br/> A: descriptive analysis</p>                                    | <p>Pakistan's economy should foster a green industrial revolution to avoid pollution and increase environmental sustainability to meet its environmental goals.</p>                                                                                                                                                                                                                                                                                                                                                     |
| 6 | <p>Effects of disaster risk reduction on socio-economic development and poverty reduction</p> <p>(Kohei, Akiyuki_2022)</p>                                                                     | <p>D: cross sectional<br/> S: 440 sample<br/> V: disaster risk reduction<br/> I: Questionnaire<br/> A: Descriptive analysis</p>                               | <p>The results show that by considering the development of the poor, the benefits of investment in disaster risk reduction can increase by ~4.4 times. Although there is uncertainty in modeling such a complex system, the results demonstrate the need to consider both the direct and indirect impacts of disaster risk reduction investments, for facilitating sustainable development in developing countries</p>                                                                                                  |
| 7 | <p>Enhancing distribution system resilience against extreme disasters considering sequential action of multi-type switches</p> <p>(Chao, Yongkang_2023)</p>                                    | <p>D: case study<br/> S: 123 sample<br/> V: extreme disaster<br/> I: Questionnaire<br/> A: descriptive analysis</p>                                           | <p>The automatic tripping process of CBs and FUs is simulated when faults occur. After the disaster, the DS is reconfigured based on RCSs and CBs after events to isolate faults and restore critical loads. The proposed method is formulated as a mixed-integer linear programming (MILP) problem, which can be efficiently solved using commercial solvers. Case studies conducted on the modified IEEE 123-bus test systems demonstrate the effectiveness of the proposed method for DS resilience enhancement.</p> |

---

|   |                                                                                                                                                                                                                                                    |                                                                                                                     |                                                                                                                                                                                                                                                                                                                                                                                                                                                                                                                                                                                                                                                                                                                                                                                                                                                                                                                                                                                                                                                                                                                                                                                                                                                                                                                                                                                                                                                                                                                                                                                                                                                                                                                                                                                                                                                                                                  |
|---|----------------------------------------------------------------------------------------------------------------------------------------------------------------------------------------------------------------------------------------------------|---------------------------------------------------------------------------------------------------------------------|--------------------------------------------------------------------------------------------------------------------------------------------------------------------------------------------------------------------------------------------------------------------------------------------------------------------------------------------------------------------------------------------------------------------------------------------------------------------------------------------------------------------------------------------------------------------------------------------------------------------------------------------------------------------------------------------------------------------------------------------------------------------------------------------------------------------------------------------------------------------------------------------------------------------------------------------------------------------------------------------------------------------------------------------------------------------------------------------------------------------------------------------------------------------------------------------------------------------------------------------------------------------------------------------------------------------------------------------------------------------------------------------------------------------------------------------------------------------------------------------------------------------------------------------------------------------------------------------------------------------------------------------------------------------------------------------------------------------------------------------------------------------------------------------------------------------------------------------------------------------------------------------------|
| 8 | <p>Disparity between evacuation intention and actual evacuation behavior during a heavy rain induced disaster event in Japan:<br/>Exploring the role of everyday awareness of disaster preparedness</p> <p>(Shane Orchard, shawn, David, 2023)</p> | <p>D: literatur review<br/>S: 120 sample<br/>V:mitigasi disaster<br/>I: Questionare<br/>A: descriptive analisis</p> | <p>Due to the effects of rapid urbanization and global climate change, the risk of water-related disasters worldwide is expected to re-main high in the future. Human losses due to floods and landslides can be significantly mitigated by rapidly evacuating residents before a disaster. However, in many cases, insufficient evacuation of residents has caused extensive losses, including human casualties.</p> <p>Based on the TPB and PMT, we examined everyday awareness of disaster preparedness, and its association with evacuation behavior during heavy rainfall, through a case study in Japan. The novelty of this study lies in its attempt to identify determinants of actual evacuation behaviors by conducting a panel survey before and after a disaster. The goal was to overcome the limitations of predisaster surveys that focus on evacuation intentions for future disasters and post-disaster surveys providing ex-post explanations for evacuation behavior during past disasters. The results of this study revealed a significant disparity between evacuation intentions before a heavy rainfall event and actual evacuation behavior during the event: many residents did not evacuate when they received an evacuation warning during a heavy rainfall event, even though they had intended to evacuate in advance. Commitment to evacuate was linked to actual evacuation behavior; thus, contemplating when to evacuate in advance of a heavy rainfall event may be crucial for prompt evacuation when such rainfall actually occurs. These findings have important implications for education and risk communication programs aiming to encourage evacuation behavior. Our results suggest that promoting evacuation intentions only is insufficient; residents should also be encouraged to ontemplate and decide on specific criteria for evacuation.</p> |
| 9 | Sustainable disaster risk                                                                                                                                                                                                                          | D: Literatur                                                                                                        | The sustainable disaster risk reduction                                                                                                                                                                                                                                                                                                                                                                                                                                                                                                                                                                                                                                                                                                                                                                                                                                                                                                                                                                                                                                                                                                                                                                                                                                                                                                                                                                                                                                                                                                                                                                                                                                                                                                                                                                                                                                                          |

---

|                                                                                                                             |                                                                                                                                                                       |                                                                                                                                                                                                                                                                                                                                                                                                                                                                                                                                                                                                                                                                                                                                                                                                                                                                                                                                                                                                                                                                                                                                                                                                                                                                                                                                                                                                                                     |
|-----------------------------------------------------------------------------------------------------------------------------|-----------------------------------------------------------------------------------------------------------------------------------------------------------------------|-------------------------------------------------------------------------------------------------------------------------------------------------------------------------------------------------------------------------------------------------------------------------------------------------------------------------------------------------------------------------------------------------------------------------------------------------------------------------------------------------------------------------------------------------------------------------------------------------------------------------------------------------------------------------------------------------------------------------------------------------------------------------------------------------------------------------------------------------------------------------------------------------------------------------------------------------------------------------------------------------------------------------------------------------------------------------------------------------------------------------------------------------------------------------------------------------------------------------------------------------------------------------------------------------------------------------------------------------------------------------------------------------------------------------------------|
| reduction training model for nurses: A descriptive qualitative approach                                                     | <p>Review<br/> S: Training system atau model<br/> V: Disaster Risk Reduction Training<br/> I: Quetionnare<br/> A: Descriptive analisis</p>                            | <p>training model provides a potential conceptual framework that may assist the continuity of educational intervention related to disaster nursing training. The 3-level training connects through professional governance and move with the six pillars, as well as the involvement of health cadres, which would continuously empower the community.</p> <p>The model is a 3-level training consisting of (1) master of trainer training (MOT), (2) training of trainer (TOT), and (3) training of providers (TOP). Professional governance is a key chain that integrates and connects these 3-level training. The model has six pillars, including (1) leadership, (2) resources, (3) intervention, (4) cultural and spiritual approach, (5) motivation, and (6) policy alignment.</p> <p>Conclusions: Sustainable disaster risk reduction training model provides a potential conceptual framework that may assist the continuity of educational intervention related to disaster nursing training.</p> <p>The type of disasters caused by nature exists in Indonesia are earthquakes, tsunamis, floods, landslides, tornados, and bushfires (BNPB, 2022). In 2004, when the giant Tsunami hit Aceh, more than 100,000 Indonesian died. It was a turning point for every party to realise the importance of mitigation and preparedness. Since then, extensive efforts have been made to reduce the impacts of a disaster.</p> |
| 10 Interactions between disaster risk reduction and intangible culture among indigenous communities in Benguet, Philippines | <p>D: qualitative mixed-methods<br/> S: culture among indigenous communities<br/> V: Disaster Risk Reduction<br/> I: Quetionnare<br/> A: a case study examination</p> | <p>The key findings of this study highlighted that several areas of local knowledge, practices, and systems focused on social support systems, cultural technologies and innovations, local rituals, and indigenous early warning systems that are present within the Benguet community, all of which are essential in strengthening DRRM at the local level. This intangible heritage has been fundamental in helping facilitate careful planning and</p>                                                                                                                                                                                                                                                                                                                                                                                                                                                                                                                                                                                                                                                                                                                                                                                                                                                                                                                                                                          |



|    |                                                                                                                                                    |                                                                                                                                                                             |                                                                                                                                                                                                                                                                                                                                                                                                                                                                                                                                                                                                                                                                                                                                                                          |
|----|----------------------------------------------------------------------------------------------------------------------------------------------------|-----------------------------------------------------------------------------------------------------------------------------------------------------------------------------|--------------------------------------------------------------------------------------------------------------------------------------------------------------------------------------------------------------------------------------------------------------------------------------------------------------------------------------------------------------------------------------------------------------------------------------------------------------------------------------------------------------------------------------------------------------------------------------------------------------------------------------------------------------------------------------------------------------------------------------------------------------------------|
|    |                                                                                                                                                    |                                                                                                                                                                             | <p>adjustments in local activities, catalysing preemptive measures against foreseeable risks. As such, greater effort should be made by the State to increase mainstreaming of these ICH and the participation of indigenous people in the planning and implementation of disaster risk reduction intervention.</p> <p>Intangible cultural heritage (ICH) are the practices, representations, expressions, knowledge, and skills in society handed down</p>                                                                                                                                                                                                                                                                                                              |
| 11 | <p>Disasters, disaster preparedness and post disaster recovery: Evidence from caribbean firms</p>                                                  | <p>D: case study<br/>S: In particular firms<br/>V: Disaster Preparedness, and post disaster recovery<br/>I: Questionnaire<br/>A: Descriptive analysis.</p>                  | <p>The results indicate that disaster preparedness and post disaster recovery strategy affect technical efficiency. In particular firms with a post disaster recovery plan to resume operations after a disaster, firms with knowledge of which parts of their business need to be operational following a disaster, and firms that ensure that their suppliers have a post disaster recovery plan experience a positive effect on technical efficiency, while firms operating in a building that is able to withstand disasters negatively affects technical efficiency</p>                                                                                                                                                                                             |
| 12 | <p>Disaster risk reduction for whom? The gap between centrally planned Disaster Management Program and people's risk perception and adaptation</p> | <p>D: mixed-method approach<br/>S: 32 respondents<br/>Disaster management<br/>V: People risk perception and adaptation<br/>I: Questionnaire<br/>A: descriptive analysis</p> | <p>We have found that if risk reduction interventions designed by the central government are not aligned with the perceived risk of the local people, the implementation of these interventions does not reduce perceived risk significantly, and consequently, People do not adopt new technologies And behavior to increase their resilience to climate change shocks. Furthermore, people's valuation of a Risk reduction intervention in reducing the perceived Risk of disasters does not change after An actual disaster takes place insinuating the relative accuracy and Robustness of local people's assessment Of such interventions.</p> <p>the design and implementation of large-scale risk-reduction interventions implemented at the community level.</p> |
| 13 | <p>Governing disaster risk in Myanmar: Institutions and</p>                                                                                        | <p>D: Cross sectional<br/>S: Disaster</p>                                                                                                                                   | <p>This paper employs secondary data collection methods, including historical</p>                                                                                                                                                                                                                                                                                                                                                                                                                                                                                                                                                                                                                                                                                        |

|    |                                                                                                                                                                                                            |                                                                                                                                                                                             |                                                                                                                                                                                                                                                                                                                                                                                                                                                                                                                                                                                                                              |
|----|------------------------------------------------------------------------------------------------------------------------------------------------------------------------------------------------------------|---------------------------------------------------------------------------------------------------------------------------------------------------------------------------------------------|------------------------------------------------------------------------------------------------------------------------------------------------------------------------------------------------------------------------------------------------------------------------------------------------------------------------------------------------------------------------------------------------------------------------------------------------------------------------------------------------------------------------------------------------------------------------------------------------------------------------------|
|    | <p>policy pathways during 1885–2015</p> <p>(Turtaining Tune_2023)</p>                                                                                                                                      | <p>risk,institutions and policy</p> <p>V: institutions and policy</p> <p>I: Questionare</p> <p>A: Descriptive analisis</p>                                                                  | <p>archives, policies, reports and other documents, to establish a historical trajectory of the evolution of Myanmar disaster and emergency management-related policies in Myanmar from 1885 to 2015. The researchers found that the policy narrative has incrementally shifted from astate-centric and top-down approach (pre-Hyogo period) to a whole-of-government approach (Hyogo period) to a polycentric model Where “whole of society” can Be involved.</p>                                                                                                                                                           |
| 14 | <p>Disparity between evacuation intention and actual evacuation behavior during a heavy rain induced disaster event in Japan:</p> <p>Exploring the role of everyday awareness of disaster preparedness</p> | <p>D: Kualitatif</p> <p>S: evacuation intention and actual evacuation behavior</p> <p>V: Disaster preparedness</p> <p>I: Questionare dept interview</p> <p>A: analyzing the survey data</p> | <p>The participants had a high level of disaster preparedness, including evacuation intentions, but many of them did not actually evacuate even when evacuation warnings were issued due to heavy rains. Furthermore, only prior contemplation of evacuation criteria (associated with the commitment to evacuate) was directly related to evacuation behavior. Finally, mediation analysis indicated that prior contemplation mediated the relationship between evacuation intentions and actual evacuation. The implications of these findings for education and communications to reduce disaster risk are discussed.</p> |
| 15 | <p>Fire safety behavior model for residential buildings: Implications for disaster risk reduction</p> <p>Vladimir M. Cvetkovi´ 2022</p>                                                                    | <p>D:cross sectional</p> <p>S: Fire Safety behavior Model</p> <p>V:Disaster Risk Reduction</p> <p>I: Questionare</p> <p>A: multivariate linear regression</p>                               | <p>Previous unexplored levels and factors influencing fire safety in residential buildings in Serbia have contributed to the design, development and testing of the fire safety behavior model with the aim of better understanding how to improve fire safety.</p> <p>In addition, the results showed that the level of perception of fire safety was lower compared to a larger number of observed dimensions of the mentioned model. In addition, there is not enough confidence in the level of preparedness and efficiency of fire and rescue units to protect them in such situations.</p>                             |

## **Discussion**

### **Disaster Risk Reduction**

A disaster is defined as an event or sequence of events that endangers and interrupts human life and economic activity due to human action or inaction, and which causes physical harm to the environment, loss of property, and emotional distress (Law No. 24/2007 Concerning Disaster Management). The International Strategy for Disaster Reduction (ISDR) defines disaster as events that significantly impair a society's functioning, large-scale human casualties due to material, economic, or environmental factors, and surpass the capacity of the affected community to recover using their own resources (Okuda K, Kawasaki, 2022).

### **Disaster Mitigation**

When discussing about mitigation, it involves reducing risks to minimize loss. The mitigation process encompasses a variety of activities and measures. Possible first steps toward safety include making plans ahead of time, assessing the danger level, and implementing a disaster management plan that incorporates rescue, rehabilitation, and relocation (Mansourian, 2021). According to Decree no. 131 of 2003, which is signed by the minister of home affairs of the Republic of Indonesia, the term "mitigation" is defined as the measures taken to lessen the impact of natural catastrophes. Important aspects of mitigation include being well-prepared, watchful, and equipped with a range of skills to deal with disasters.

Various initiatives to increase public knowledge and preparedness in anticipating disasters have been initiated in Indonesia at various administrative levels. This effort involves many agencies and institutions at the local national, and international levels (Preeya S.Mohan, 2023). However, the effectiveness of these efforts is still unclear because there is no framework and tools to assess the level of community preparedness and the sustainability of these activities. So far, efforts to increase community preparedness have been carried out based on the concerns, objectives, and capabilities of the institutions concerned. Therefore, it is still uncertain whether these efforts have fulfilled all the elements required for disaster preparedness.

### **Safety of Disaster**

The paradigm has shifted from perceiving disasters as random occurrences to actively engaging in mitigation and controlling them whenever possible. The most

important issue, however, is how to include safety measures in this catastrophe. For social organizations and units to fit in with society, the concept of "vulnerability" evolved. Natural disasters can occur at any time, is often unpredictable, and catch people off guard, leading to a lack of preparedness when a disaster strikes (Lukewich J, 2023). This unpreparedness may be accounted for by insufficient knowledge regarding preparedness in facing disasters. It is necessary to prepare the community through activities that prepare them to anticipate disaster quickly and effectively to protect them from significant losses in disasters. Disaster readiness is the state in which society, both at an individual and collective level, has the physical and psychological capacity to deal with the aftermath of a catastrophe.

According to Benjamin Blum, the knowledge or cognitive aspect plays a pivotal role in determining an individual's actions. Blum's theory posits that, in addition to environmental factors, people's attitudes and actions have the greatest influence on individuals and communities. Environmental variables are ranked as the top factor according to this viewpoint. There is a strong correlation between one's attitude and their perception, personality, and motivation, making attitude a key factor in behavior modification. A person's attitude might be defined as the conceptual framework they develop through their life experiences. A person's reactions to other people, objects, and situations in his life are influenced by it (Hatori T, 2023). Attitudes inherently include emotional components, cognitive components (including views, ideas, and beliefs), and behavior, and perceptions are inextricably linked to this.

A person's attitude, as defined by Sukidjo, is a state of mind and nervous system preparedness influenced by experience, directly affecting how individuals respond to everything that happens to them. An individual's moral stance represents their evaluation of any given situation or item. After becoming familiar with the stimuli or item, individuals will likely evaluate or act in response to it. Management of disaster emergency response includes post-disaster reconstruction or rehabilitation by paying attention to local wisdom and increasing community capacity.

Urgent disaster risks can be addressed by conducting disaster management training or simulations to improve the public's understanding of dealing with disaster risks. Disasters are no longer considered a sporadic phenomenon but as manageable and reducible events. However, how do we then place the safety element in this disaster? The emergence of the idea of "vulnerability" is developed to accommodate institutions and social units as parts.

## **CONCLUSION**

Local community plays an important role in identifying hazards, designing preparation plans, detecting and responding to crises, and executing recovery operations. Leaders in the community and local health care providers (such as family physicians, nurses, midwives, pharmacists, and community health workers) have the power to establish credibility, spread knowledge, and identify vulnerable individuals.

Disaster risk reduction is the concept and practice of systematically reducing disaster risk. Some examples of the efforts include reducing the factors that cause exposure to hazards, reducing human and property vulnerability, managing land and the environment, and increasing preparedness for disaster impacts, among others. Disaster risk reduction includes disaster management disaster mitigation and disaster preparedness, and is also a part of sustainable development. Disaster risk reduction efforts are very important in every aspect of life. Although disaster events are unavoidable, it is very important to optimize risk reduction efforts so that when a disaster occurs, society can immediately bounce back and recover quickly.

## **ACKNOWLEDGMENTS**

Thank you to the nursing lecturers at Airlangga University and friends who have helped write this article.

## **CONFLICT of INTEREST**

None

## REFERENCES

- Haque A, Fatema K, Disaster risk reduction for whom? The gap between centrally planned Disaster Management Program and people's risk perception and adaptation, *International Journal of Disaster Risk Reduction* 82 (2022) 103229, <https://doi.org/10.1016/j.ijdr.>
- H. Setyawan, A.M. Nugraheni, S. Haryati, I. Qadrijati, R. Fajariani, T.L. Wardani, T.B. Atmojo, I. Sjarifah, The correlation of fire knowledge toward **disasters response and preparedness** practice among hospital nurse Klaten Central Java, Indonesia, *IOP Conf. Ser. Earth Environ. Sci.* 724 (2021), 012041, <https://doi.org/10.1088/1755-1315/724/1/012041>
- Hatori T, Moriwaki R, Disparity between evacuation intention and actual evacuation behavior during a heavy rain induced disaster event in Japan: Exploring the role of everyday awareness of disaster preparedness, *International Journal of Disaster Risk Reduction*, 92 (2023) 103729 <https://doi.org/10.1016/j.ijdr.>
- Kanyasan K, Nonaka D, Implementation of disaster risk reduction and management policies in a school setting in Lao PDR: a case study, *Tropical Medicine and Health* (2018) 46:42 <https://doi.org/10.1186/s41182-018-0124-7>
- Lawangen A, Roberts J, Interactions between disaster risk reduction and intangible culture among indigenous communities in Benguet, Philippines, *International Journal of Disaster Risk Reduction* 94 (2023) 103801 <https://doi.org/10.1016/j.ijdr.>
- Lukewich J, Mathews M Primary care nursing competencies in Canadian undergraduate nursing programs: A national cross-sectional survey, *Nurse Education in Practice* 71 (2023) 103738 <https://doi.org/10.1016/j.nepr.2023.103738>
- M.A. Chisty, M. Rahman, Coping capacity assessment of urban fire disaster: an exploratory study on ward no: 30 of Old Dhaka area, *Int. J. Disaster Risk Reduc.* 51 (2020) 101878, <https://doi.org/10.1016/j.ijdr.2020.101878>.
- Mansourian H, Mayhew S, The pathways between natural disasters and violence against children: a systematic review, *BMC Public Health* 21, (2021) <https://doi.org/10.1186/s12889-021-11252-3>
- Okuda K, Kawasaki, A Effects of disaster risk reduction on socio-economic development and poverty reduction, *International Journal of Disaster Risk Reduction* 80 (2022) 103241, <https://doi.org/10.1016/j.ijdr.>
- Preeya S.Mohan, Disasters, disaster preparedness and post disaster recovery: Evidence from Caribbean firms, *International Journal of Disaster Risk Reduction* 92 (2023) 103731 <https://doi.org/10.1016/j.ijdr>
